# Supplementary material for: Therapeutic targeting of vascular malformation in a zebrafish model of hereditary haemorrhagic telangiectasia
Source: Oxford University Press journal article supplement (doi:10.1242/dmm.049567), 2023-03-02
Supplement: dmm049567supp.pdf [file dmm049567supp.pdf]

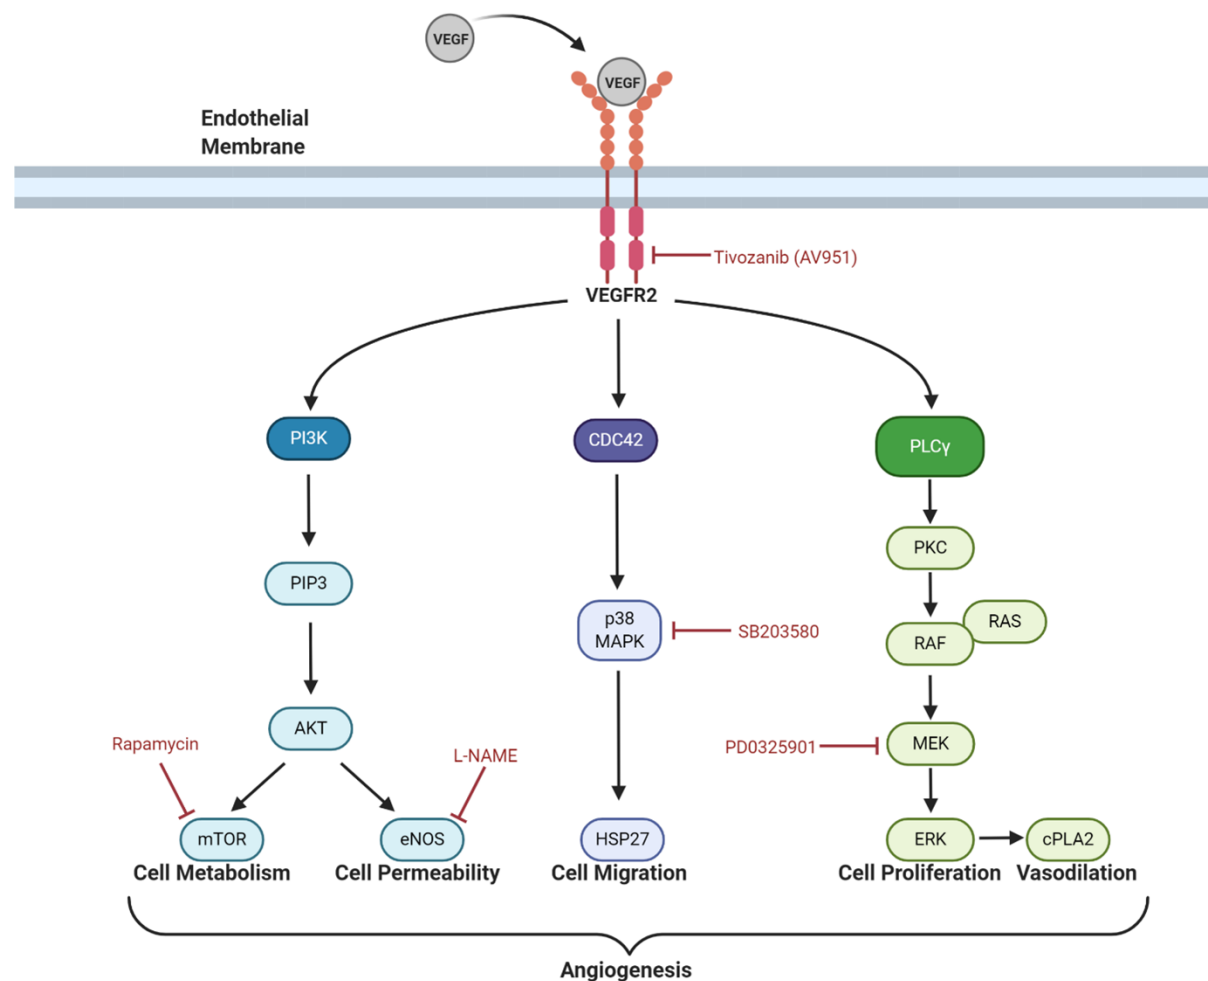

**Fig. S1. Schematic diagram summarising VEGF signalling in endothelial cells.**

Drugs targeting VEGFR2 and enzymes in different downstream pathways are shown in red. Figure created with BioRender (<https://biorender.com/>). (Adapted from (Snodgrass et al., 2021)).

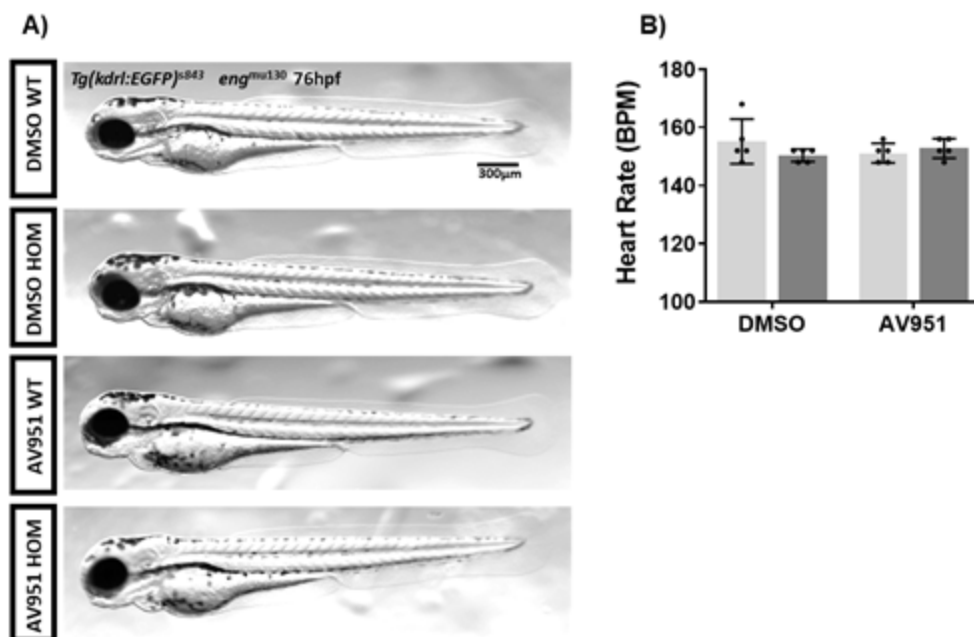

**Fig. S2. WT and *eng<sup>mu130</sup>* mutant embryos display no obvious morphological differences when treated with VEGF inhibitors.** A) Representative images of 3dpf WT and *eng<sup>mu130</sup>* homozygous (HOM) mutant embryos with and without AV951 (50nM) treatment for 24h. B) Quantification of heart rate for WT and *eng<sup>mu130</sup>* mutant embryos with and without AV951 treatment. (5/group).

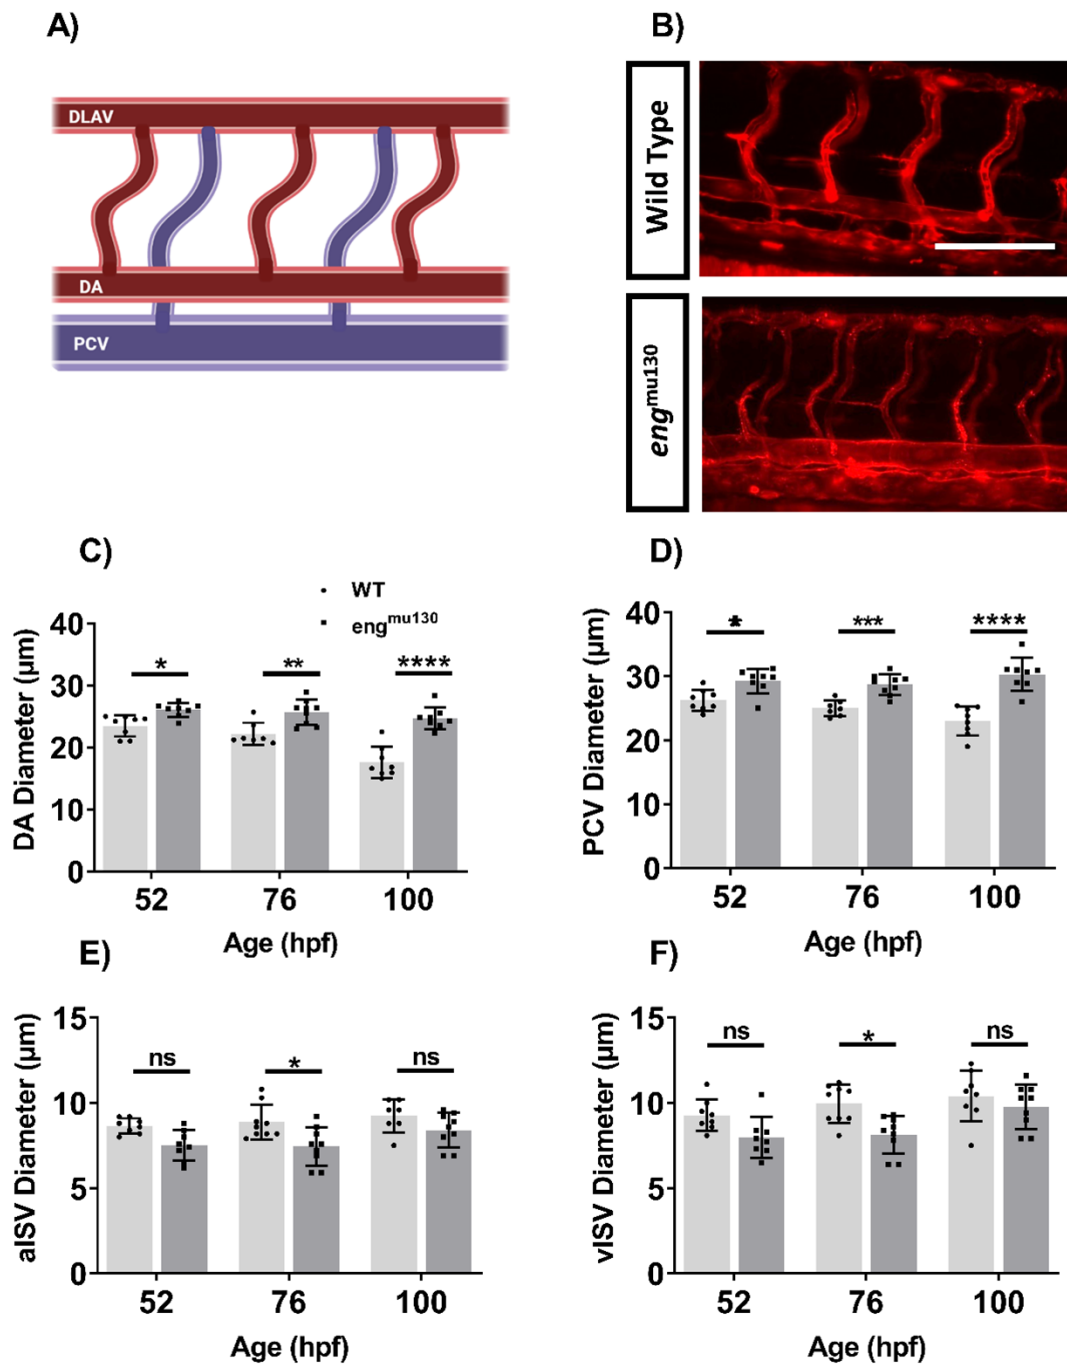

**Fig. S3. *eng*<sup>mu130</sup> mutant embryos display increased diameters in the dorsal aorta and cardinal vein compared with control siblings.** A) Schematic diagram of the region of interest. Figure created with BioRender (<https://biorender.com/>). B) Representative maximum intensity projection of *Tg(kdrl:Hsa.HRAS-mCherry)*<sup>s916</sup> WT and *eng*<sup>mu130</sup> trunk vasculature at 76hpf. Abbreviations: DA, dorsal aorta; PCV, posterior cardinal vein; aISV, arterial intersegmental vessel; vISV, venous intersegmental vessel. Scale bar = 100µm. C,D,E and F) Significantly enlarged vessel diameters of DA and PCV in *eng*<sup>mu130</sup> embryos compared with WT siblings. mCherry intensity was used to establish ISV lumen size. aISV, and vISV are thinner in *eng*<sup>mu130</sup> mutants at 76h, and partially normalise by 100h. (one-way ANOVA with Tukey post-hoc test, 8-10/group.)

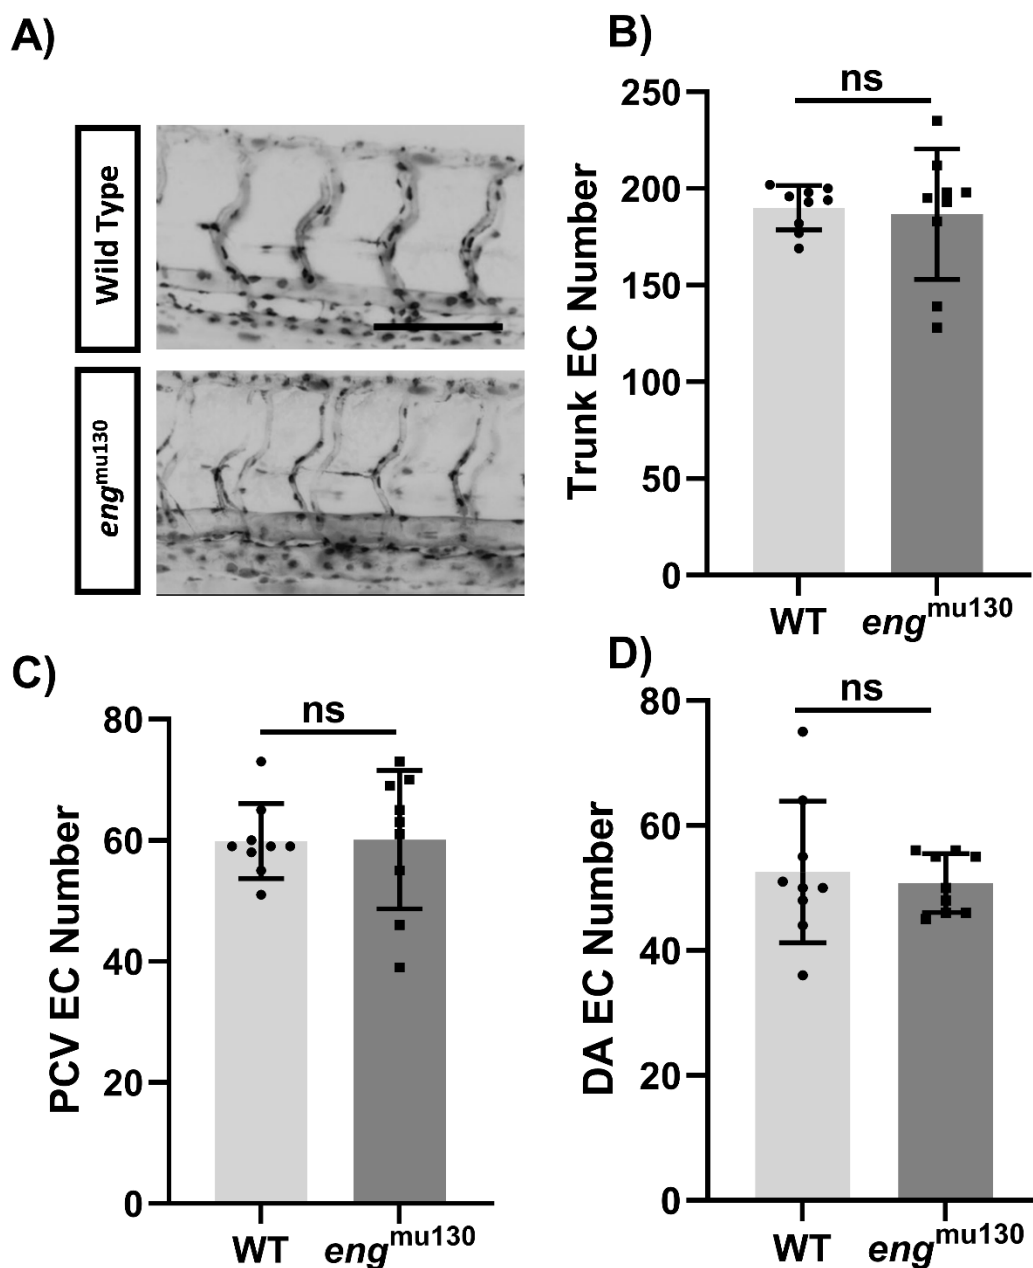

**Fig. S4. *endoglin* loss of function does not affect endothelial cell numbers.** A) Representative maximum intensity projection of *Tg(kdrl:Hsa.HRAS-mCherry)*<sup>s916</sup>, *Tg(fli1a:nEGFP)*<sup>y7</sup> trunk vasculature at 72hpf. B) Quantification of endothelial cell nuclei in all vessels in the region of interest. C) Quantification of endothelial cell nuclei in the posterior cardinal vein (PCV). D) Quantification of endothelial cell nuclei in the dorsal aorta (DA). (Unpaired student's t-test, 9/group.)

A)

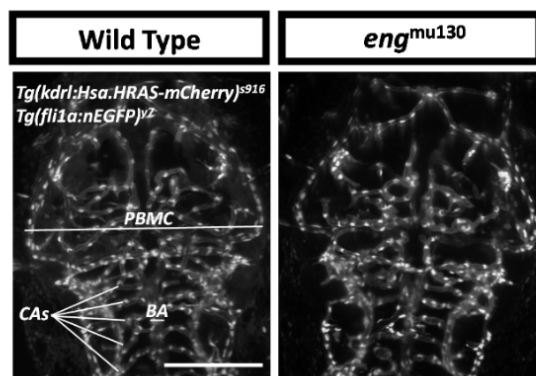

B)

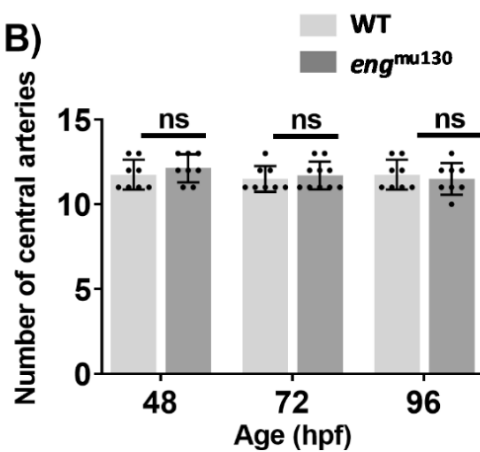

C)

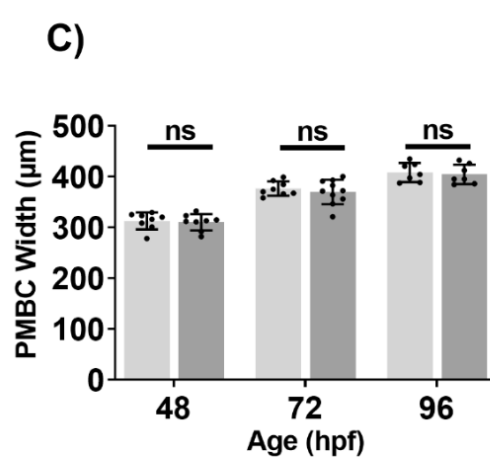

D)

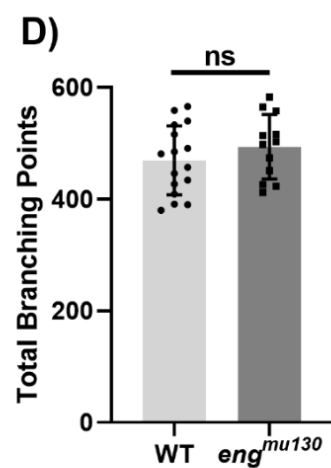

E)

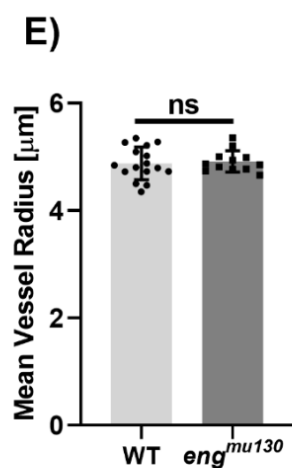

F)

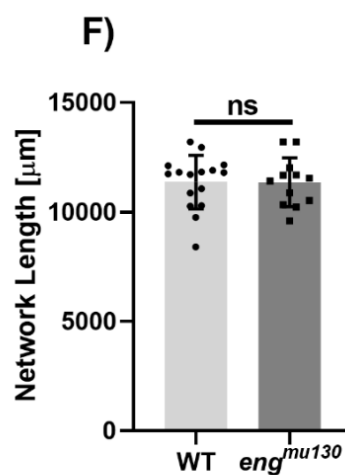

**Fig. S5. *eng*<sup>mu130</sup> mutant cranial vasculature phenotypic analysis compared with wild-types at 2-4 dpf.** A) Representative maximum intensity projection of the region of interest in 3dpf embryonic cranial vasculature. *Tg(kdr1:Hsa.HRAS-mCherry)*<sup>s916</sup> labels endothelial cell membrane and *Tg(fli1a:nEGFP)*<sup>y7</sup> labels endothelial cell nuclei. Abbreviations: BA, basilar artery; PMBC, posterior midbrain channel; CA, central arteries. Scale bar = 150µm. B) The number of midbrain central arteries is similar in *eng*<sup>mu130</sup> and wild-type siblings. Data analysed by one-way ANOVA with Tukey post-hoc test. n = 8-10/group. C) PMBC diameter is similar in *eng*<sup>mu130</sup> and wild-type siblings. Data analysed by one-way ANOVA with Tukey post-hoc test. n = 8-10/group. D, E, F) An automated image analysis pipeline was used to quantify total branching points, mean vessel radius, and total network length in 72hpf wildtype and *eng*<sup>mu130</sup> embryos. Data analysed by unpaired student's t-test. n = 15/group.

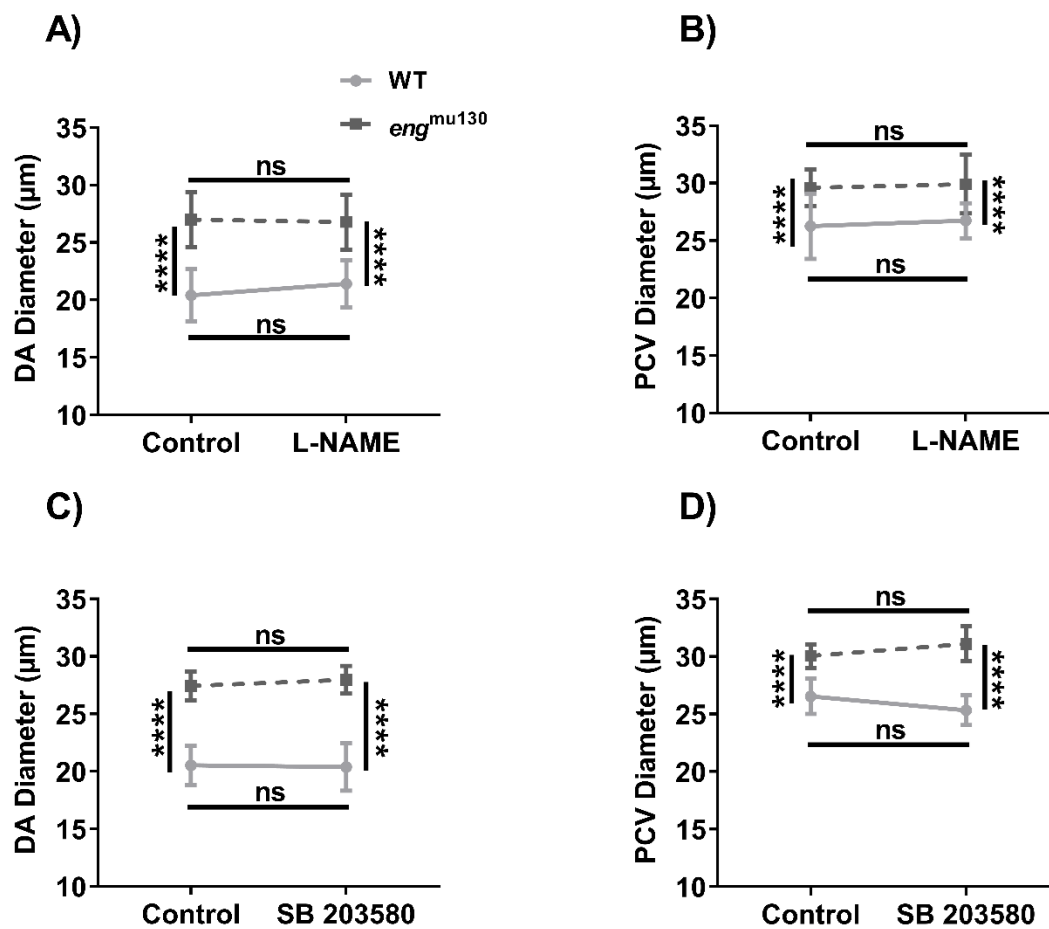

**Fig. S6. NOS or p38 MAPK inhibition between 2-3dpf does not affect the phenotype of *eng*<sup>mu130</sup> and WT embryos.** A, B) Quantification of vessel diameter for the DA and PCV in WT and *eng*<sup>mu130</sup> mutant embryos with and without L-NAME treatment. C, D) Quantification of vessel diameter for the DA and PCV in WT and *eng*<sup>mu130</sup> mutant embryos with and without SB 203580 treatment. (two-way ANOVA with Tukey post-hoc test, 10-15/group.)
